# Supplementary material
Source: PubMed Central journal article supplement (PMC9278839)

Fig. S1

Postnatal Day

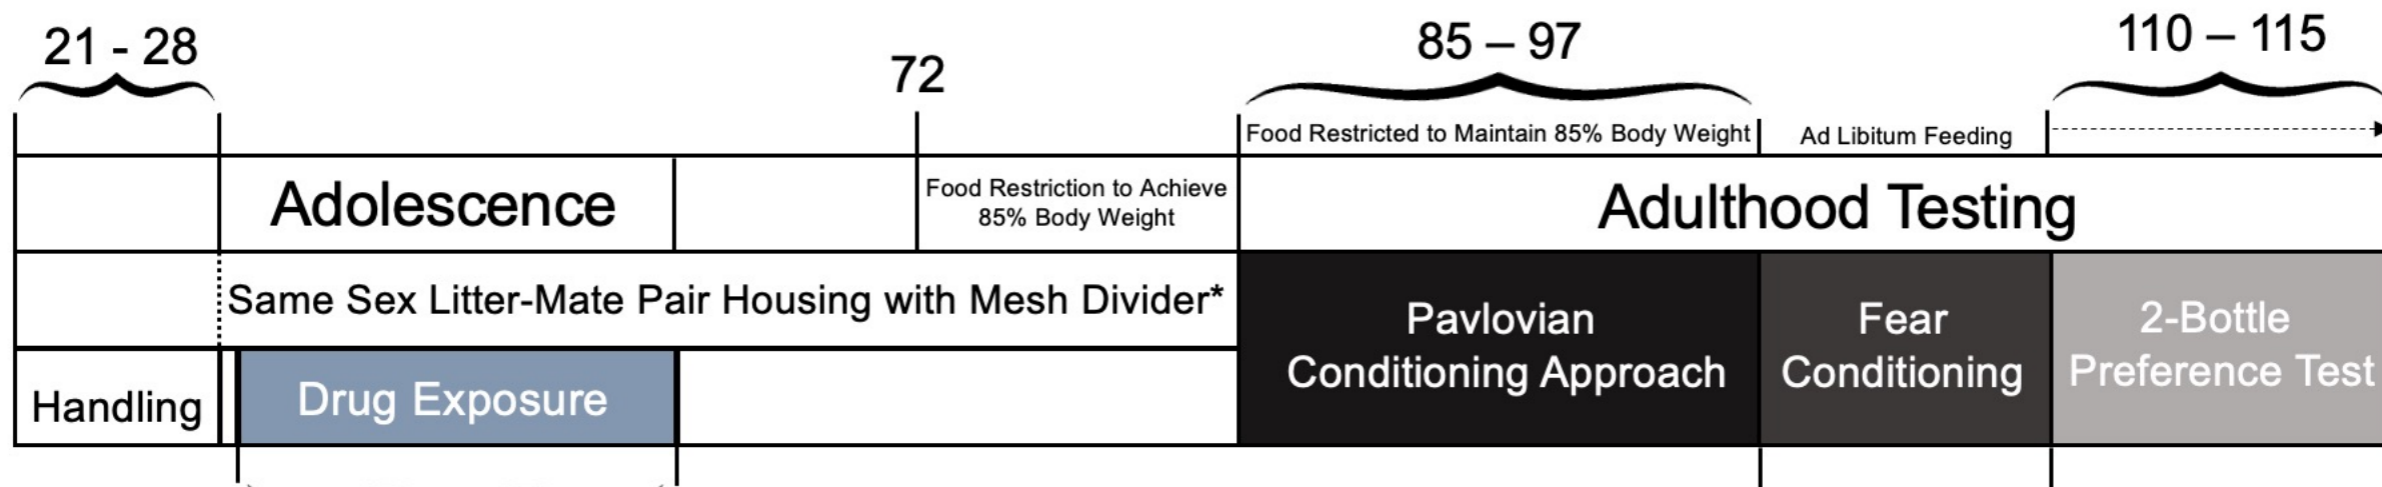

30 - 46

| GROUP | DRUG EXPOSURE            |
|-------|--------------------------|
| CO    | Vehicle Vapor + Water    |
| AO    | Vehicle Vapor + Alcohol  |
| NO    | Nicotine Vapor + Water   |
| AN    | Nicotine Vapor + Alcohol |

$N_{\text{total}} = 74$  Sprague-Dawley Rats;  $N = 8-11/\text{group}/\text{sex}$

Fig. S2

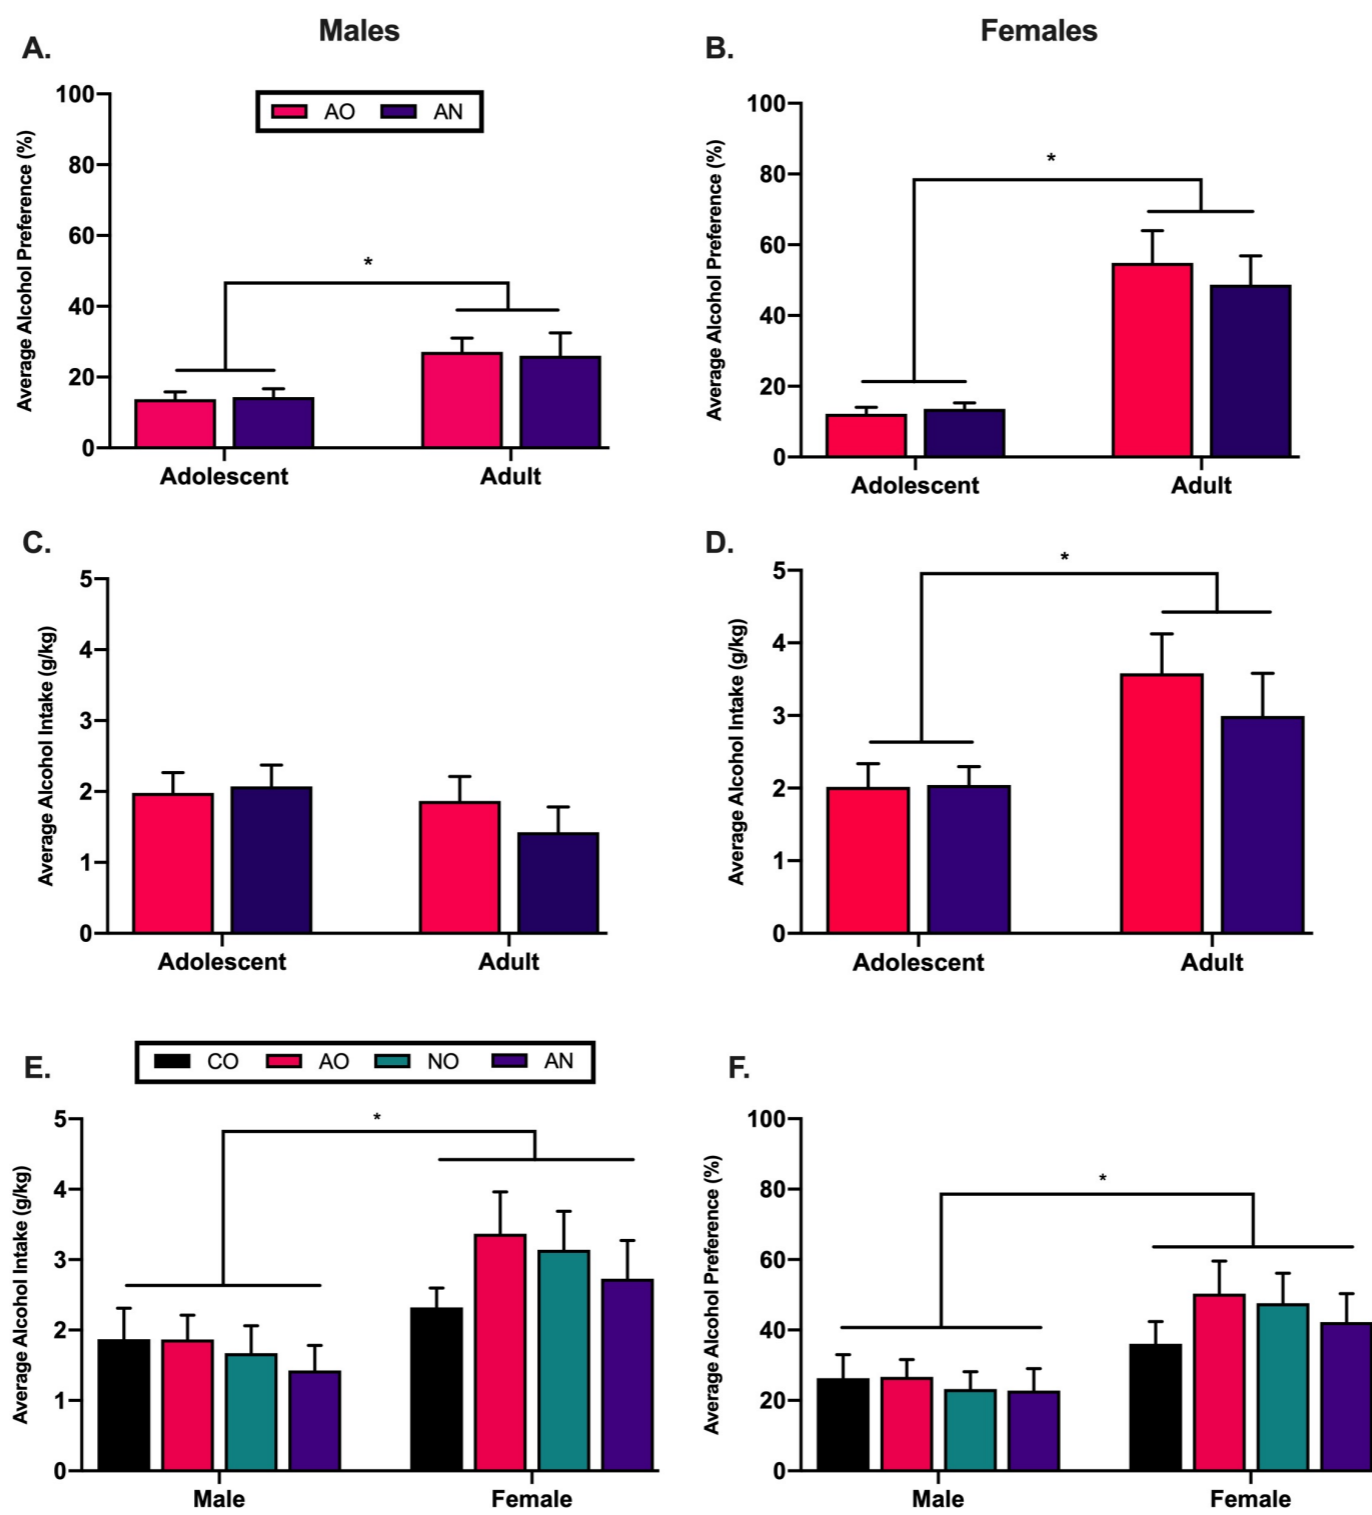

Fig. S3

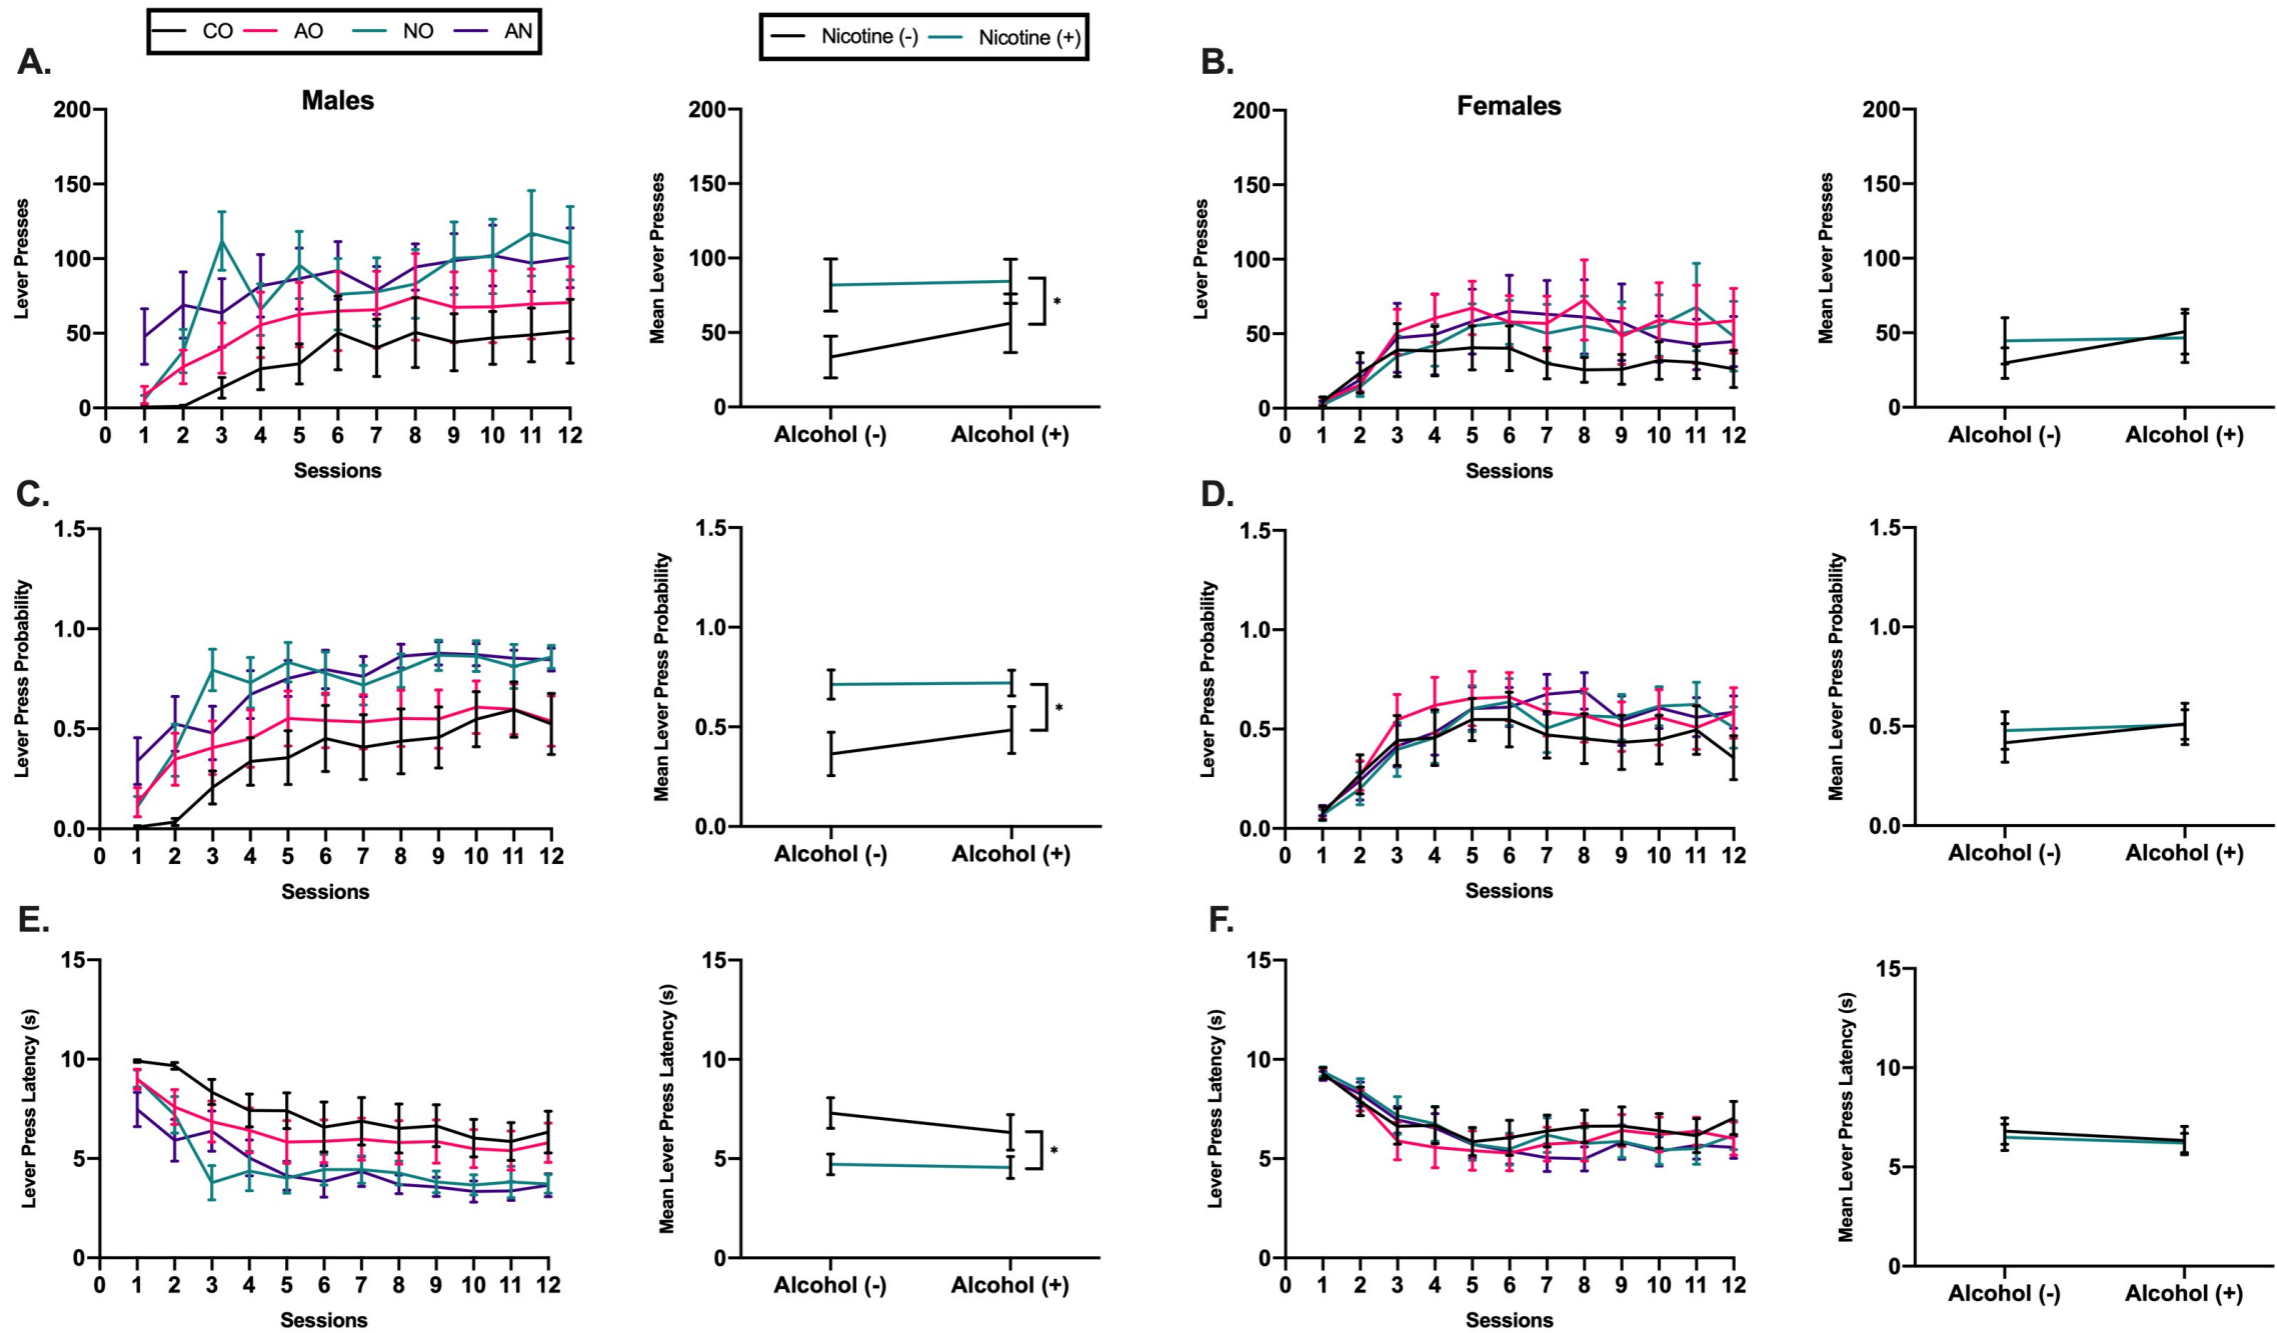

Fig. S4

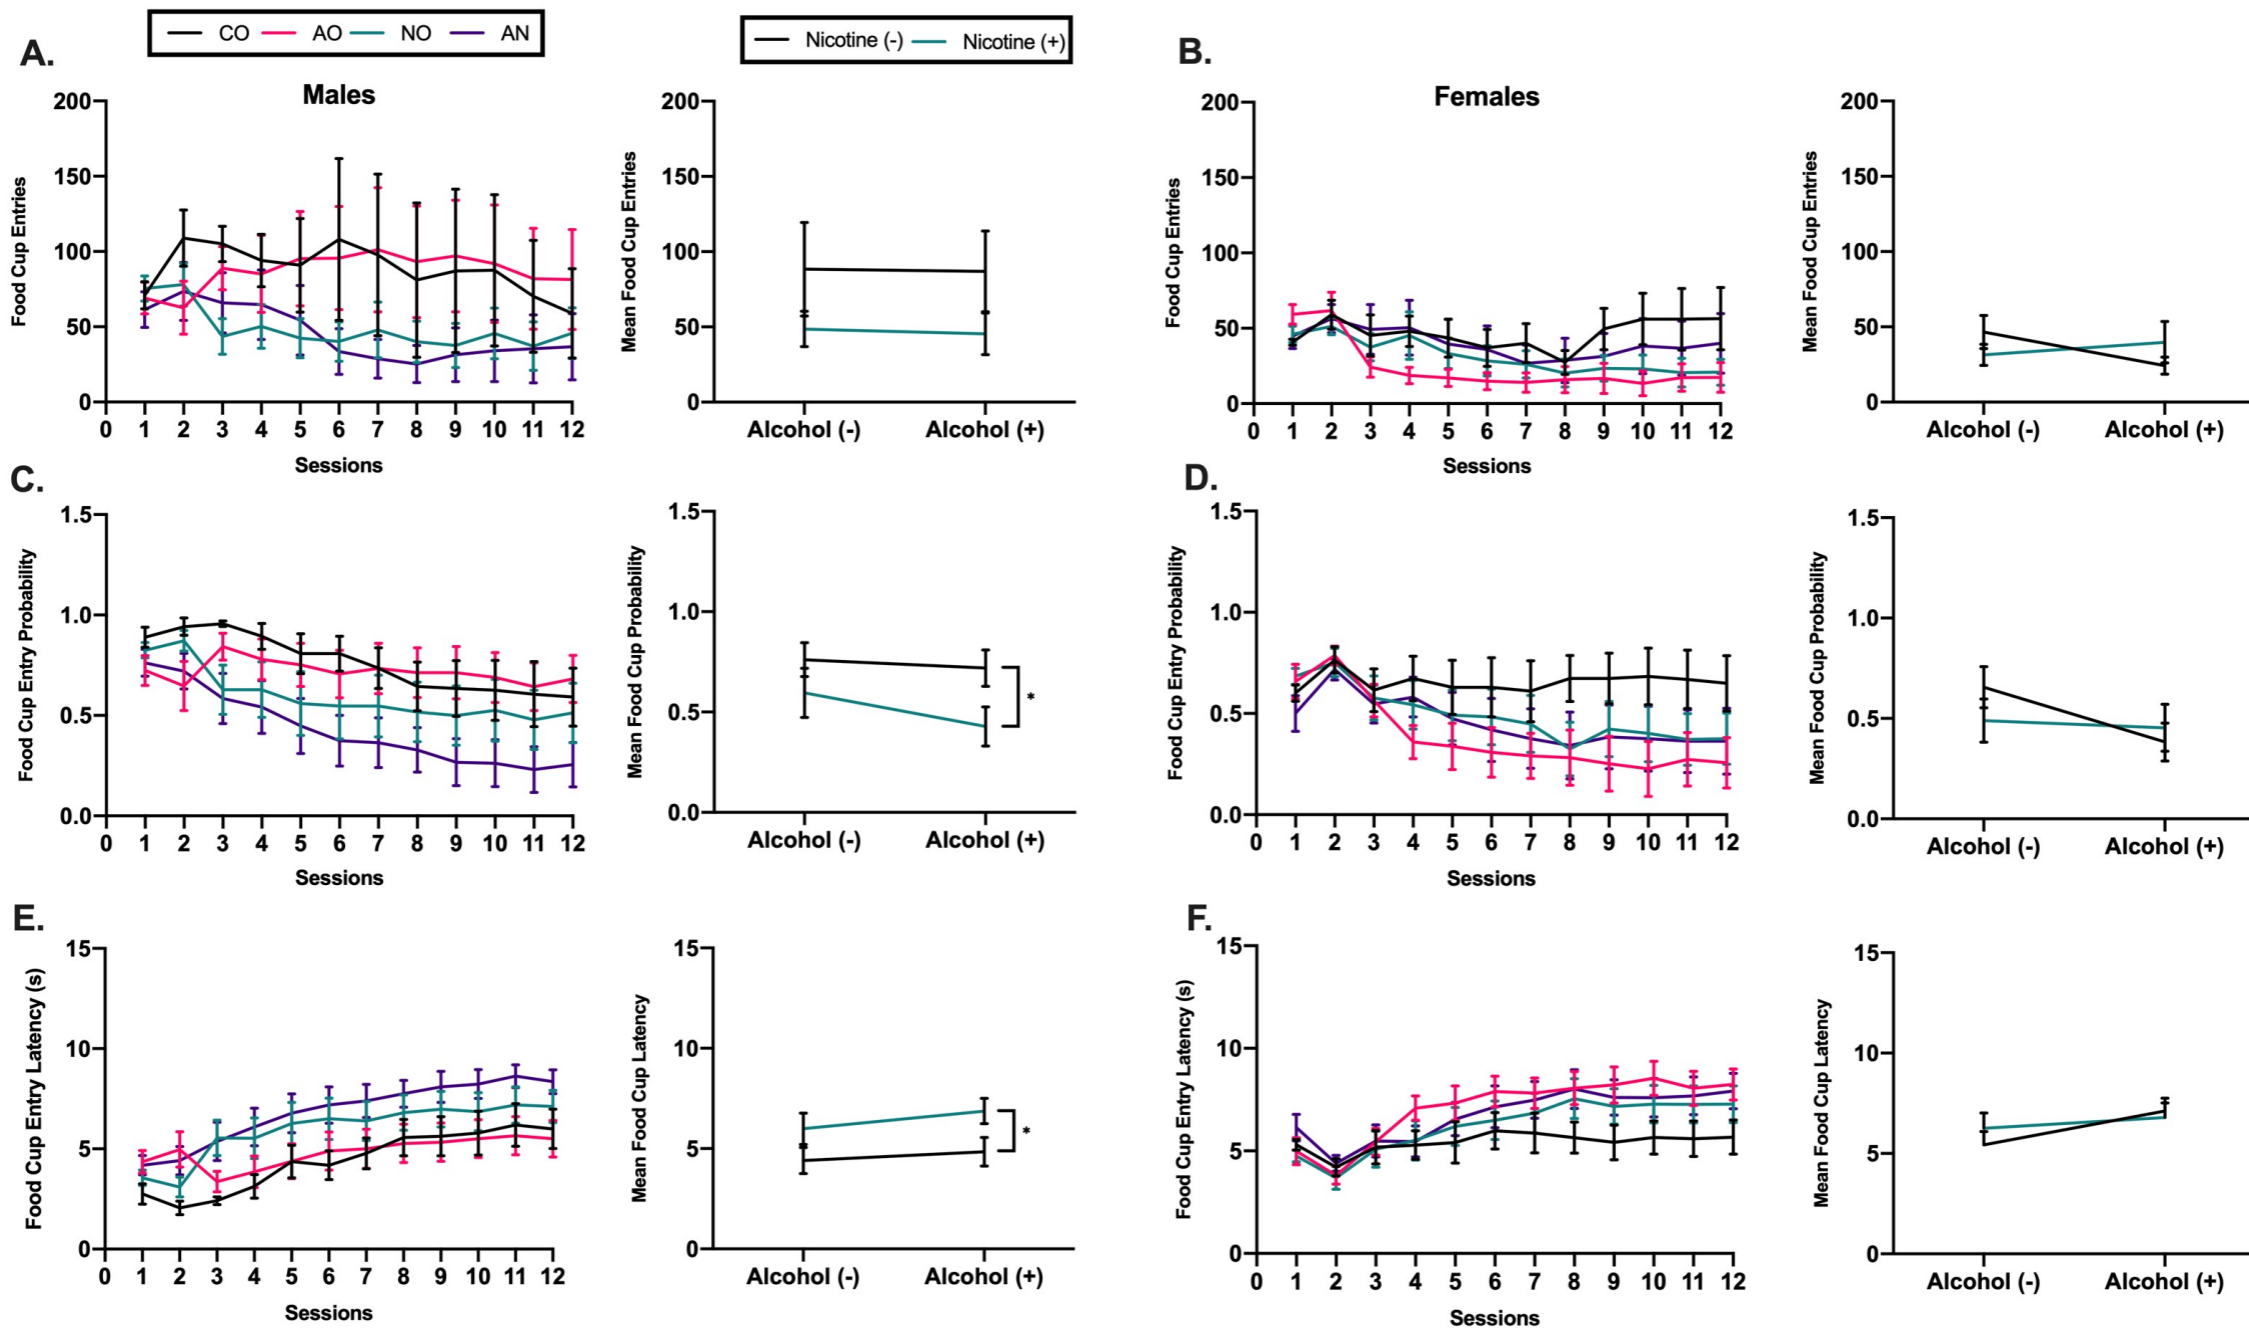

Fig. S5

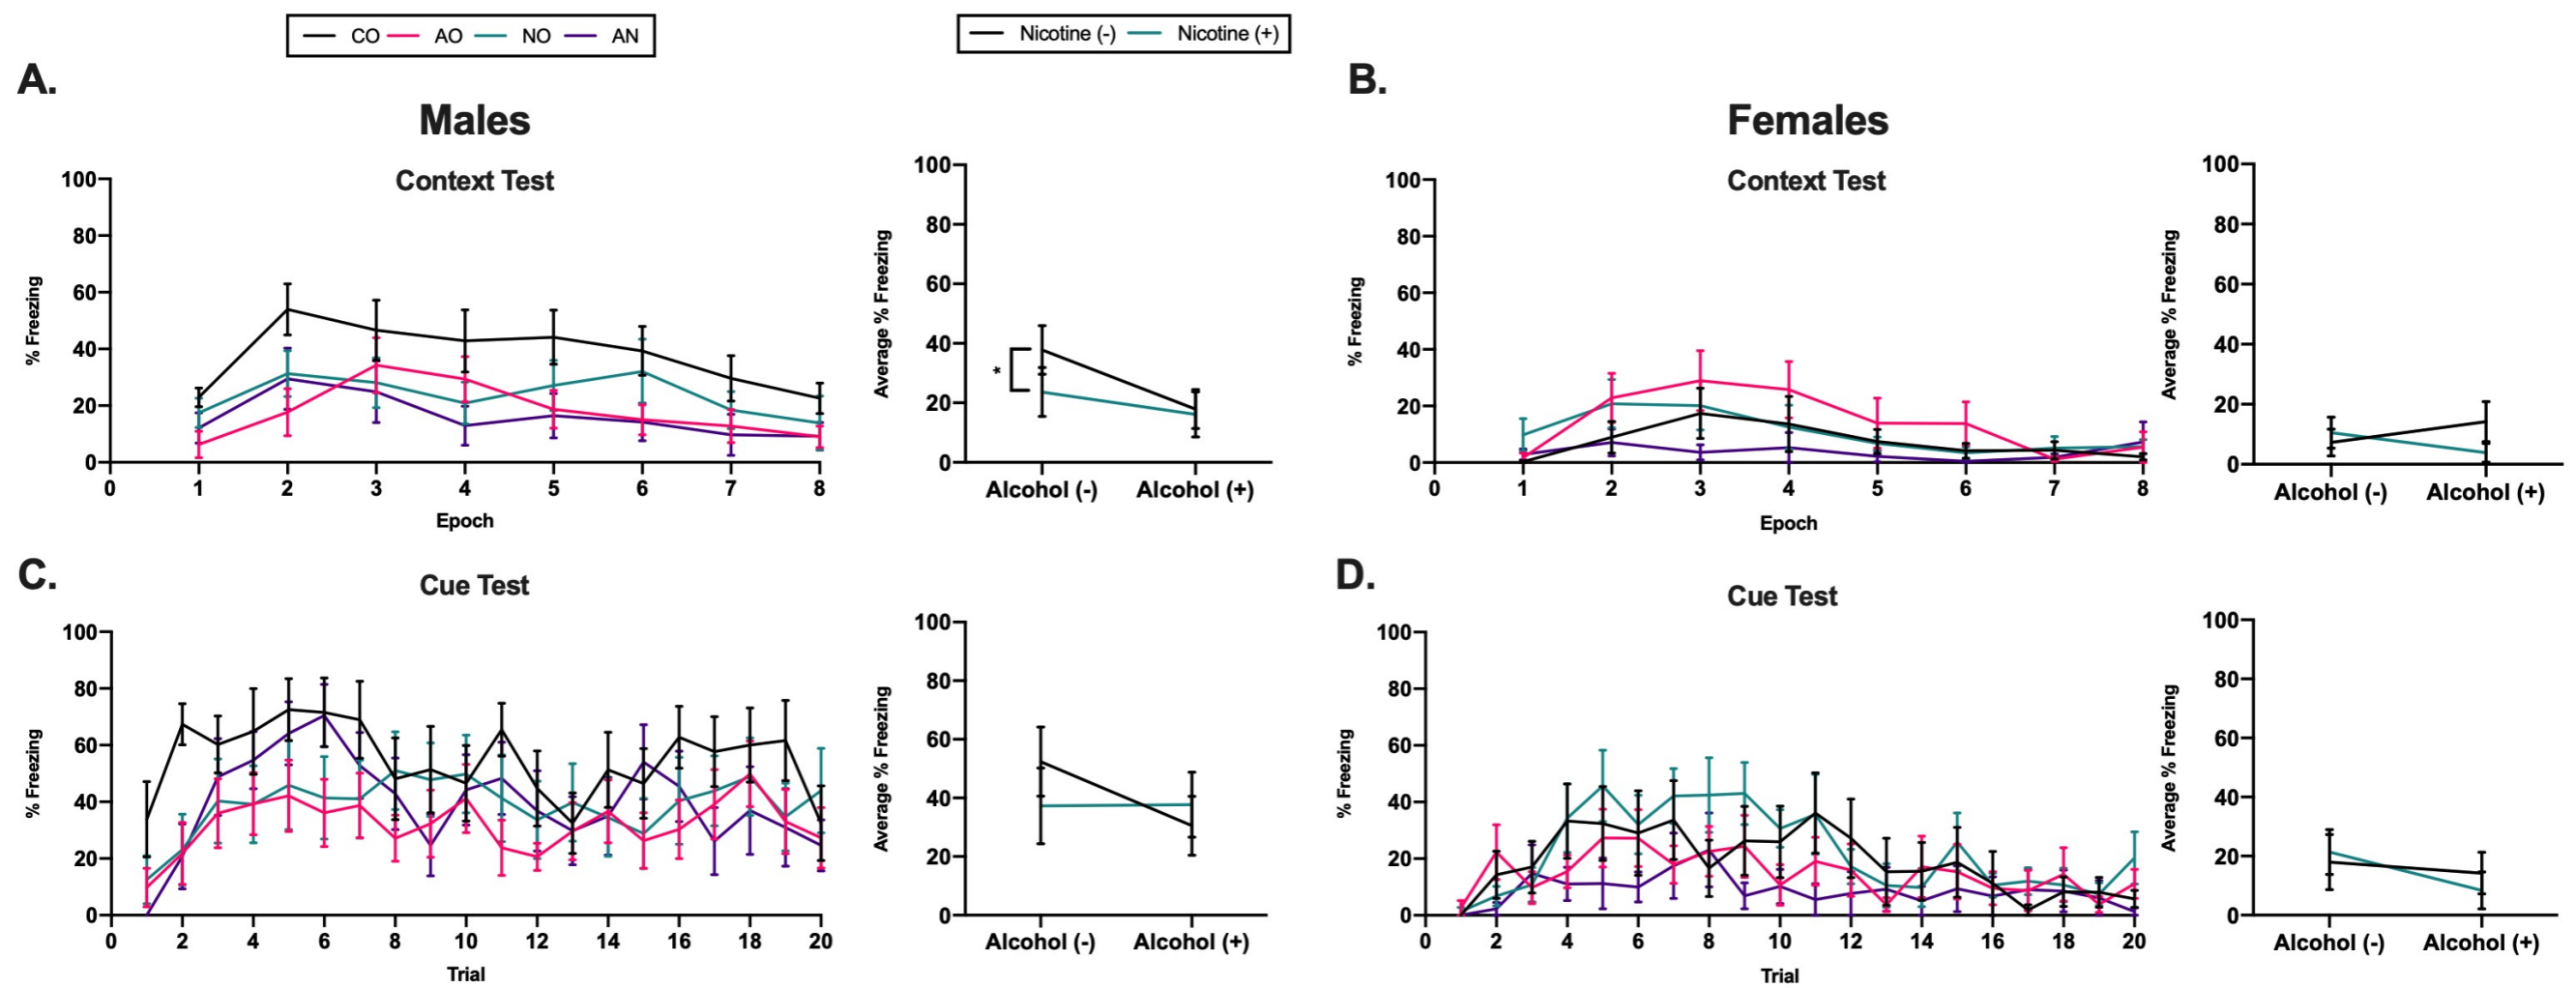

Supplement: ntab250_suppl_supplementary_figures_s1_s5.pdf [file ntab250_suppl_supplementary_figures_s1_s5.pdf]
